# Supplementary material for: Antioxidant Potential of the Sweet Whey-Based Beverage Colada after the Digestive Process and Relationships with the Lipid and Protein Fractions
Source: MDPI journal article supplement (doi:10.3390/antiox11091827), 2022-09-16
Supplement: s1 [file s1]

## TABLES SENSORY EVALUATION

**Table S1.** Discriminant sensory analysis of different formulations of *Colada* (25-5 % Maracuyá juice) by trained judges (n=5)<sup>1</sup>.

| Categories         | Attributes       | 25%      |                  | 15% <sup>3</sup> |                | 10%      |                | 7%       |                | 5%       |                |
|--------------------|------------------|----------|------------------|------------------|----------------|----------|----------------|----------|----------------|----------|----------------|
|                    |                  | Mean     | CVC <sup>2</sup> | Mean             | CVC            | Mean     | CVC            | Mean     | CVC            | Mean     | CVC            |
| Flavor             | Bitter           | 3        | 0.56032          | 2                | 0.48032        | 3        | 0.64032        | 2        | 0.36032        | 2        | 0.32032        |
|                    | Salty            | 2        | 0.48032          | 2                | 0.36032        | 3        | 0.60032        | 2        | 0.48032        | 2        | 0.40032        |
|                    | <b>Acidic</b>    | <b>4</b> | <b>0.76032</b>   | <b>5</b>         | <b>0.92032</b> | <b>3</b> | <b>0.68032</b> | <b>3</b> | <b>0.60032</b> | <b>3</b> | <b>0.56032</b> |
|                    | <b>Sweet</b>     | <b>4</b> | <b>0.76032</b>   | <b>5</b>         | <b>0.96032</b> | <b>3</b> | <b>0.68032</b> | <b>3</b> | <b>0.64032</b> | <b>3</b> | <b>0.64032</b> |
|                    | Umami            | 2        | 0.40032          | 2                | 0.32032        | 3        | 0.64032        | 2        | 0.40032        | 2        | 0.36032        |
|                    | Spicy            | 3        | 0.56032          | 3                | 0.68032        | 2        | 0.48032        | 2        | 0.40032        | 2        | 0.36032        |
|                    | Astringent       | 2        | 0.36032          | 2                | 0.48032        | 2        | 0.40032        | 2        | 0.32032        | 2        | 0.36032        |
| Color              | Brightness       | 2        | 0.40032          | 3                | 0.56032        | 2        | 0.32032        | 2        | 0.40032        | 2        | 0.40032        |
|                    | Transparency     | 3        | 0.56032          | 2                | 0.44032        | 2        | 0.48032        | 2        | 0.48032        | 2        | 0.36032        |
|                    | <b>Opacity</b>   | <b>4</b> | <b>0.80032</b>   | <b>5</b>         | <b>0.92032</b> | <b>4</b> | <b>0.88032</b> | <b>4</b> | <b>0.80032</b> | <b>4</b> | <b>0.80032</b> |
|                    | <b>Pallor</b>    | <b>4</b> | <b>0.88032</b>   | <b>5</b>         | <b>0.96032</b> | <b>5</b> | <b>0.92032</b> | <b>4</b> | <b>0.84032</b> | <b>4</b> | <b>0.88032</b> |
| Texture            | Pasty            | 3        | 0.60032          | 3                | 0.64032        | 3        | 0.60032        | 2        | 0.36032        | 2        | 0.40032        |
|                    | <b>Tender</b>    | <b>4</b> | <b>0.84032</b>   | <b>5</b>         | <b>0.96032</b> | <b>4</b> | <b>0.88032</b> | <b>4</b> | <b>0.88032</b> | <b>4</b> | <b>0.80032</b> |
|                    | Rubbery          | 3        | 0.68032          | 2                | 0.32032        | 3        | 0.60032        | 1        | 0.28032        | 2        | 0.32032        |
|                    | Fluid            | 3        | 0.64032          | 2                | 0.48032        | 2        | 0.44032        | 2        | 0.44032        | 1        | 0.28032        |
|                    | <b>Dense</b>     | <b>4</b> | <b>0.84032</b>   | <b>5</b>         | <b>0.96032</b> | <b>5</b> | <b>0.92032</b> | <b>4</b> | <b>0.88032</b> | <b>4</b> | <b>0.88032</b> |
|                    | <b>Viscous</b>   | <b>4</b> | <b>0.80032</b>   | <b>5</b>         | <b>0.92032</b> | <b>4</b> | <b>0.88032</b> | <b>4</b> | <b>0.88032</b> | <b>4</b> | <b>0.80032</b> |
|                    | Elastic          | 2        | 0.48032          | 3                | 0.64032        | 3        | 0.60032        | 2        | 0.44032        | 3        | 0.52032        |
|                    | Sticky           | 2        | 0.40032          | 1                | 0.28032        | 3        | 0.60032        | 2        | 0.44032        | 2        | 0.36032        |
|                    | Adherent         | 3        | 0.52032          | 3                | 0.52032        | 2        | 0.48032        | 2        | 0.44032        | 2        | 0.36032        |
|                    | <b>Fine</b>      | <b>4</b> | <b>0.72032</b>   | <b>5</b>         | <b>0.92032</b> | <b>4</b> | <b>0.80032</b> | <b>4</b> | <b>0.88032</b> | <b>4</b> | <b>0.80032</b> |
| General Appearance | Liquid           | 3        | 0.56032          | 3                | 0.64032        | 3        | 0.60032        | 3        | 0.56032        | 2        | 0.36032        |
|                    | <b>Low Dense</b> | <b>4</b> | <b>0.88032</b>   | <b>5</b>         | <b>0.96032</b> | <b>4</b> | <b>0.80032</b> | <b>4</b> | <b>0.84032</b> | <b>4</b> | <b>0.84032</b> |
|                    | Dense            | 2        | 0.48032          | 3                | 0.56032        | 3        | 0.60032        | 2        | 0.32032        | 2        | 0.40032        |
|                    | Very Dense       | 3        | 0.52032          | 2                | 0.44032        | 3        | 0.56032        | 2        | 0.40032        | 2        | 0.44032        |

<sup>1</sup> The measure scale was of five points (1: not perceived, 2: poorly perceived, 3: fairly perceived, 4: well perceived and 5: excellent perceived)

<sup>2</sup> CVC: Concordance Validity Coefficient (from < 0.60, very deficient, to > 0.90, excellent)

<sup>3</sup> The *Colada* at 15% Maracuyá juice obtained the best score with CVC values of 0.92 - 0.96.

**Table S2.** Hedonic evaluation of *Colada* (15 % Maracuyá juice) by consumers (n=80)<sup>1</sup>.

| Categories         | Attributes       | Mean     | CVC <sup>2</sup> |
|--------------------|------------------|----------|------------------|
| Flavor             | Bitter           | 1        | 0.29             |
|                    | Salty            | 3        | 0.58             |
|                    | <b>Acidic</b>    | <b>4</b> | <b>0.85</b>      |
|                    | <b>Sweet</b>     | <b>4</b> | <b>0.87</b>      |
|                    | Umami            | 2        | 0.48             |
|                    | Spicy            | 3        | 0.50             |
|                    | Astringent       | 2        | 0.50             |
| Color              | Brightness       | 3        | 0.52             |
|                    | Transparency     | 2        | 0.44             |
|                    | <b>Opacity</b>   | <b>4</b> | <b>0.80</b>      |
|                    | <b>Pallor</b>    | <b>4</b> | <b>0.82</b>      |
| Texture            | Pasty            | 1        | 0.30             |
|                    | <b>Tender</b>    | <b>4</b> | <b>0.90</b>      |
|                    | Rubbery          | 1        | 0.30             |
|                    | Fluid            | 3        | 0.65             |
|                    | <b>Dense</b>     | <b>4</b> | <b>0.80</b>      |
|                    | <b>Viscous</b>   | <b>4</b> | <b>0.85</b>      |
|                    | Elastic          | 1        | 0.30             |
|                    | Sticky           | 3        | 0.65             |
|                    | Adherent         | 1        | 0.30             |
|                    | <b>Fine</b>      | <b>4</b> | <b>0.80</b>      |
| General Appearance | Liquid           | 1        | 0.30             |
|                    | <b>Low Dense</b> | <b>4</b> | <b>0.83</b>      |
|                    | Dense            | 1        | 0.30             |
|                    | Very Dense       | 1        | 0.30             |

<sup>1</sup> The measure scale was of five points (1: not perceived, 2: poorly perceived, 3: fairly perceived, 4: well perceived and 5: excellent perceived).

<sup>2</sup> CVC: Concordance Validity Coefficient (from < 0.60, very deficient, to > 0.90, excellent).

Consumers evaluated the beverage with CVC between 0.80 and 0.90.

## FIGURES CHOROMATOGRAMS

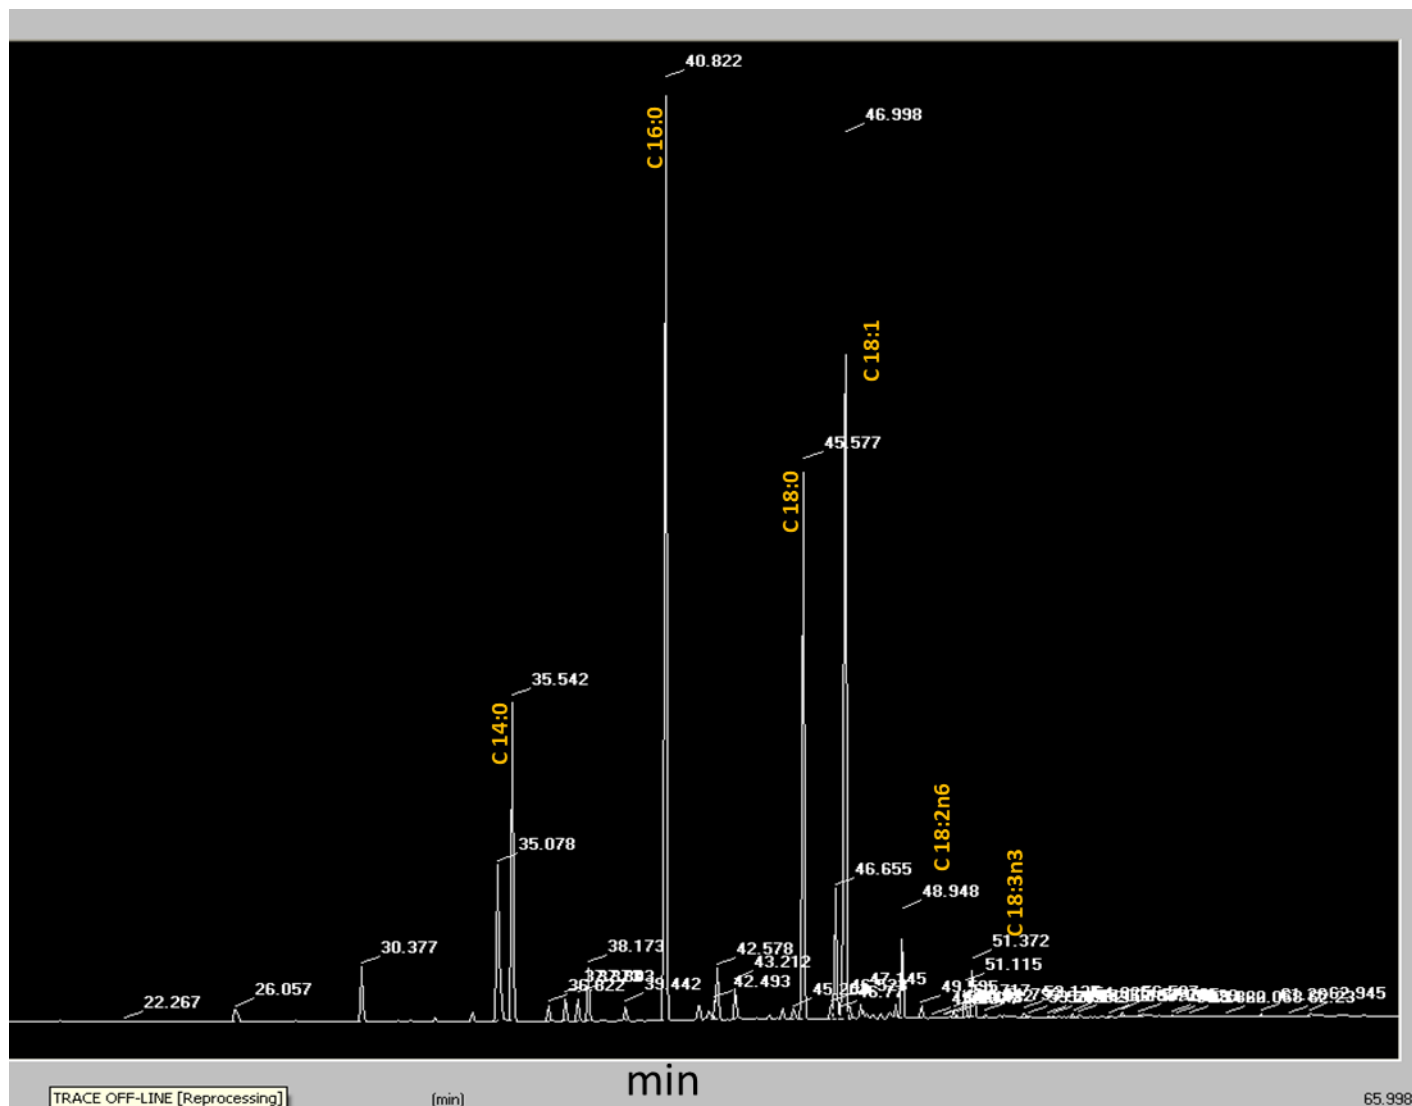

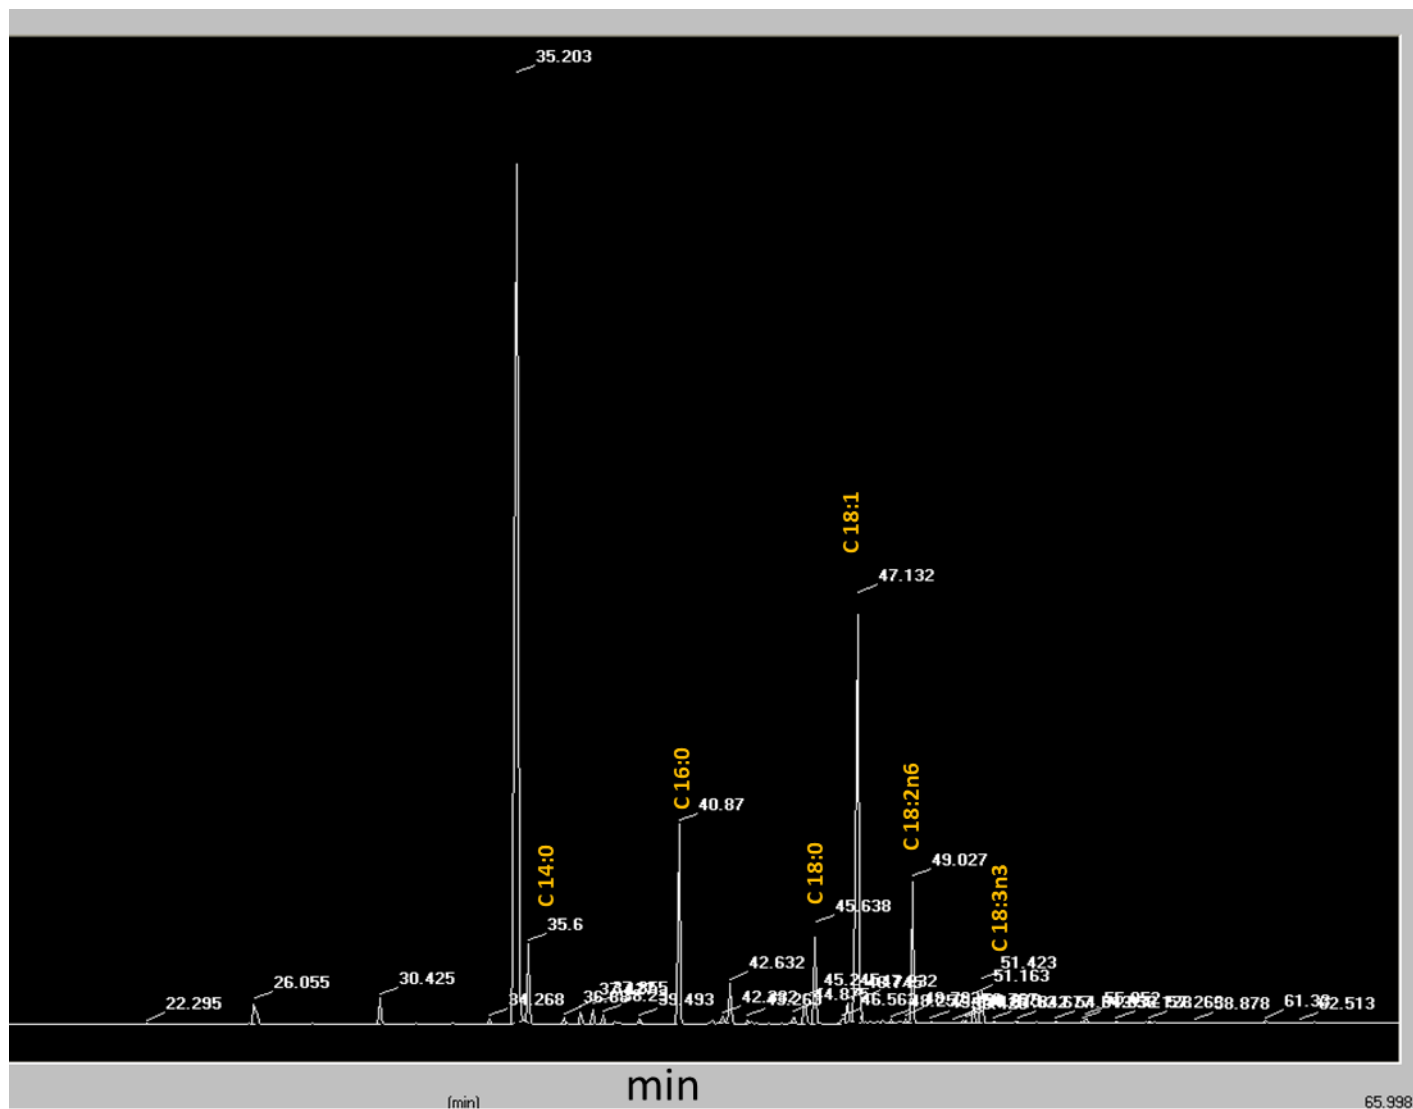

**Figure S2.** Chromatogram (GC) of fatty acid methyl esters (FAME) of the whey-beverage (*Colada*) after the in vitro digestion (bioaccessible fraction).

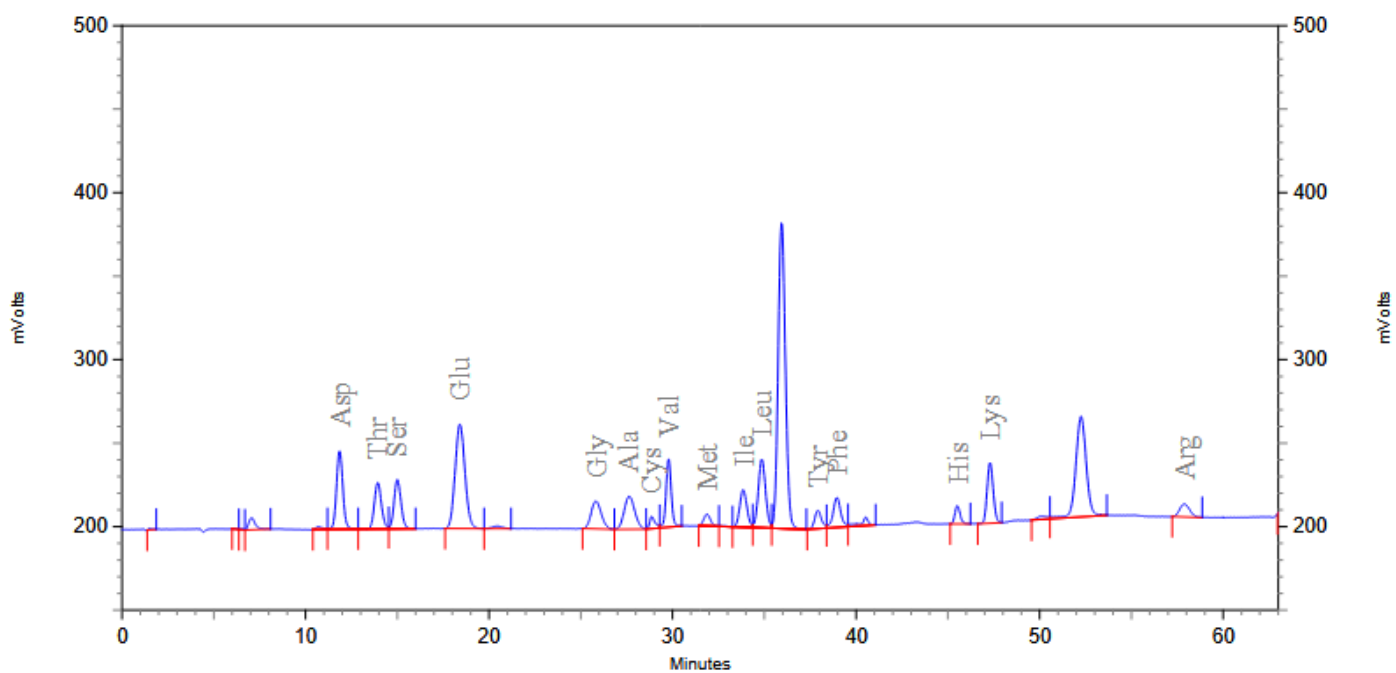

**Figure S3.** Chromatogram (HPLC) of amino acids of the whey-beverage (*Colada*) (acid hydrolysis).

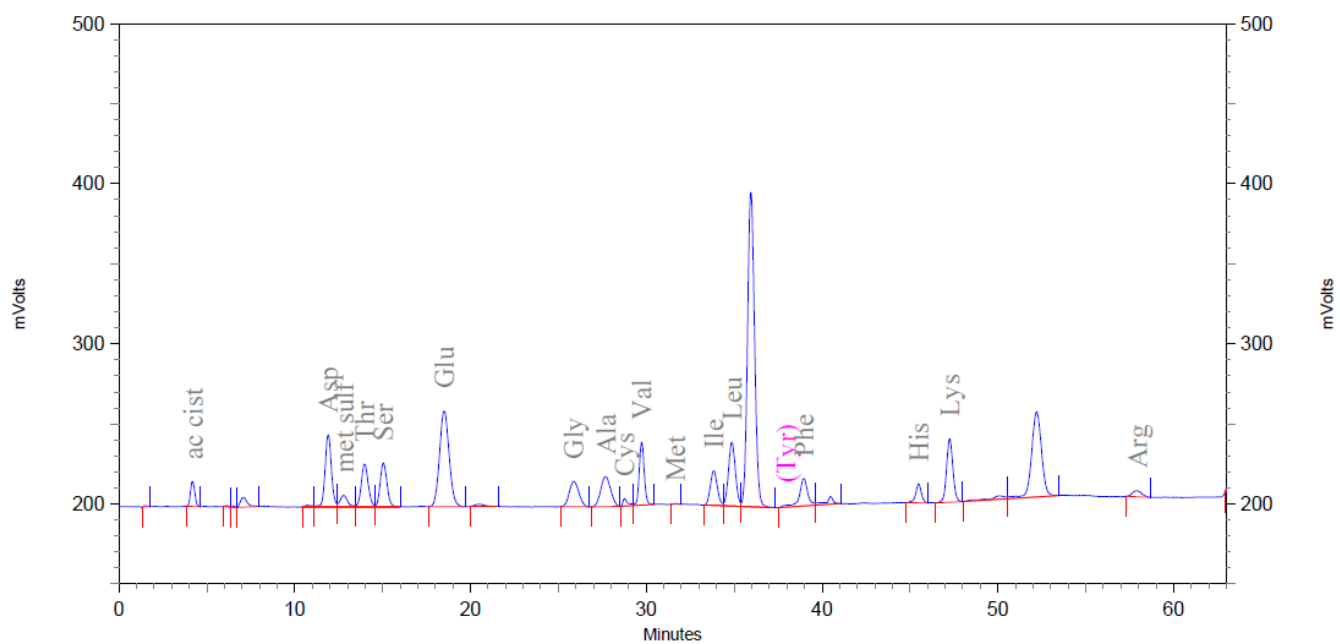

**Figure S4.** Chromatogram (HPLC) of amino acids of the whey-beverage (*Colada*) (performic oxidation).
